# Supplementary material for: Sedentary patterns and health outcomes in the oldest-old: a latent profile analysis
Source: PeerJ journal article supplement (doi:10.7717/peerj.17505), 2024-06-24
Supplement: Codebook.pdf [file Codebook.pdf]

## Codebook Healthy 80+ study

| Categorical Data | Code | Respective Factor               | -> Recoded Categorical Data | Code | Respective Factor                 |
|------------------|------|---------------------------------|-----------------------------|------|-----------------------------------|
| Sex              | 1    | Men                             |                             |      |                                   |
|                  | 2    | Female                          |                             |      |                                   |
| Famylsituation   | 1    | Single                          |                             |      |                                   |
|                  | 2    | Partner, living alone           |                             |      |                                   |
|                  | 3    | Cohabiting/married              |                             |      |                                   |
| House            | 1    | Home                            |                             |      |                                   |
|                  | 2    | Service flat                    |                             |      |                                   |
|                  | 3    | Nursery home                    |                             |      |                                   |
| Home environment | 1    | Countryside                     |                             |      |                                   |
|                  | 2    | Village                         |                             |      |                                   |
|                  | 3    | Outskirts                       |                             |      |                                   |
|                  | 4    | City                            |                             |      |                                   |
| Diploma          | 1    | No diploma                      | -> Education                | 1    | Without higher education (1 -> 5) |
|                  | 2    | Primary school                  |                             | 2    | Higher education (6 -> 7)         |
|                  | 3    | Vocational secondary education  |                             |      |                                   |
|                  | 4    | Technical secondary education   |                             |      |                                   |
|                  | 5    | General secondary education     |                             |      |                                   |
|                  | 6    | Higher education, no university |                             |      |                                   |
|                  | 7    | University                      |                             |      |                                   |
| BMI groups       | 1    | Underweight                     |                             |      |                                   |
|                  | 2    | Normal range                    |                             |      |                                   |
|                  | 3    | Overweight                      |                             |      |                                   |
|                  | 4    | Obese                           |                             |      |                                   |
